# Supplementary material for: A label-free multifunctional nanosensor based on N-doped carbon nanodots for vitamin B12 and Co2+ detection, and bioimaging in living cells and zebrafish
Source: Royal Society of Chemistry journal article supplement (doi:10.1039/d0tb00443j), 2020-01-01
Supplement: d0tb00443j1.pdf [file d0tb00443j1.pdf]

# **A label-free multifunctional nanosensor based on N-doped carbon nanodots for vitamin B<sub>12</sub> and Co<sup>2+</sup> determination, and bioimaging in living cells and zebrafish**

Fangfang Du<sup>a</sup>, Zhe Cheng<sup>a</sup>, Marius Kremer<sup>b</sup>, Yang Liu<sup>a</sup>, Xiaodong Wang<sup>a</sup>, Shaomin Shuang<sup>a</sup> and Chuan Dong<sup>a,\*</sup>

<sup>a</sup>*Institute of Environmental Science, and School of Chemistry and Chemical Engineering, Shanxi University, Taiyuan 030006, China.*

<sup>b</sup>*Institut für Anorganische Chemie, RWTH Aachen University, Landoltweg 1, 52074 Aachen, Germany.*

*\*Corresponding author. Fax: +86-351-7018613; Tel: +86-351-7018613; E-mail: dc@sxu.edu.cn.*

## **1. Materials**

Dried Artemesia was bought from a medicinal herb pharmacy in Haozhuo, Anhui, China. 1,2-Ethylenediamine (EDA), ethanol and other chemical reagents were obtained from Sigma-Aldrich Chemical Company. vitamin B<sub>12</sub> was obtained from Aladdin-Reagent Company. All reagents in the experiment are of analytical reagent grade or above, which were used as received without further purification. Water was deionized and purified by being passed through a Milli-Q Plus system.

## **2. Characterization of N-CNDs**

Fluorescence and UV-visible absorption spectra were obtained using spectrophotometer (Varian Cary Eclipse) and a Lambda 365 spectrophotometer (PerkinElmer, Llantrisant, U.K.). Fourier transform infrared (FT-IR) spectra of N-CNDs were performed by a Bruker Tensor II spectrometer as KBr pellets. Transmission electron microscope (TEM) and high-resolution TEM (HRTEM) images were collected on a JEM-2100F Transmission Electron Microscope (Japan) operated at 200 kV. Dynamic light scattering (DLS) was obtained on a Zetasizer Nano ZS90 (Malvern, Worcestershire, U.K.). X-ray photoelectron spectroscopy was obtained by XPS

system (ESCALAB 250Xi, Thermo Scientific, Al-Ka radiation), which operated under a base pressure of 109 Torr at a power of 72 W (12 kV). The elemental analysis was conducted on an Elementar Vario Micro Cube (Germany). The fluorescence lifetime was carried out with a FLS 920 fluorescence spectrophotometer (Edinburgh Instruments Ltd). A FE20 pH meter (Mettler Toledo, Switzerland) was applied to adjust the pH value. An inVia Raman microscope (Renishaw, England) was used for Raman spectroscopy in backscattering geometry with a CCD detector. The Raman spectra of N-CND was performed on a Renishaw Invia Reflex confocal microscope.

### **3. MTT assay for the cell cytotoxicity**

MTT assay is a quantitative colorimetric assay which assesses the in vitro cytotoxicity of N-CNDs using A549 cells. Typically, 100  $\mu$ L of cells were seeded in a 96-well plate with a density of  $4 \times 10^5$  cells per well and allowed to adhere overnight. Six replicate wells were used for each control and tested concentrations. After cultured in a 5% CO<sub>2</sub> incubator at 37 °C for 24 h, cells were treated with the other 100  $\mu$ L DMEM, containing various concentrations of CNDs (0-2000  $\mu$ g/mL) for another 24 h. At the end of the incubation, 10  $\mu$ L of MTT (0.1 M PBS) was added into each well. After additional 4 h incubation, the growth media were removed, and the obtained mixtures were dissolved in 100  $\mu$ L DMSO and shaken for 10 min. Finally, the optical density of each sample was recorded using a microplate reader (SynergyMx, Biotek, USA) at a wavelength of 490 nm. The cell viability was estimated according to the following equation:

$$\text{Cell viability (\%)} = \text{OD}_{\text{treated}} / \text{OD}_{\text{control}} \times 100\%$$

### **4. Measurement of quantum yield (QY):**

The QY was calculated according to the following formula:

$$\Phi_c = \Phi_s \times (I_c / I_s) \times (A_s / A_c) \times (\eta_c^2 / \eta_s^2)$$

where  $\phi$  is QY, the subscripts “c” and “s” refer to CDs and standard, respectively. “I” means the integrated area in the emission spectrum, “A” is the absorbance at 360 nm wavelength and  $\eta$  is the refractive index of the solvent. Quinine sulfate with a known QY in 0.1 M H<sub>2</sub>SO<sub>4</sub> solution was employed as the fluorescence standard ( $\phi_s = 54\%$ ,  $\eta_s = 1.33$ ). To minimize the reabsorption effect,  $A_c$  and  $A_s$  in the 1 cm fluorescence cuvette were kept below 0.10.

**Table S1** Elemental analysis of the as-synthesized N-CNDs: (a) elemental content and (b) relative number of atoms in N-CNDs.

(a)

| Sample name | Elemental content (%) |      |       |               |
|-------------|-----------------------|------|-------|---------------|
|             | C                     | H    | N     | O(Calculated) |
| N-CNDs      | 39.57                 | 8.84 | 24.09 | 27.50         |

(b)

| Sample name | Relative number of atoms |    |   |   | Empirical formula                                             |
|-------------|--------------------------|----|---|---|---------------------------------------------------------------|
|             | C                        | H  | O | N |                                                               |
| N-CNDs      | 11                       | 29 | 6 | 6 | C <sub>11</sub> H <sub>29</sub> N <sub>6</sub> O <sub>6</sub> |

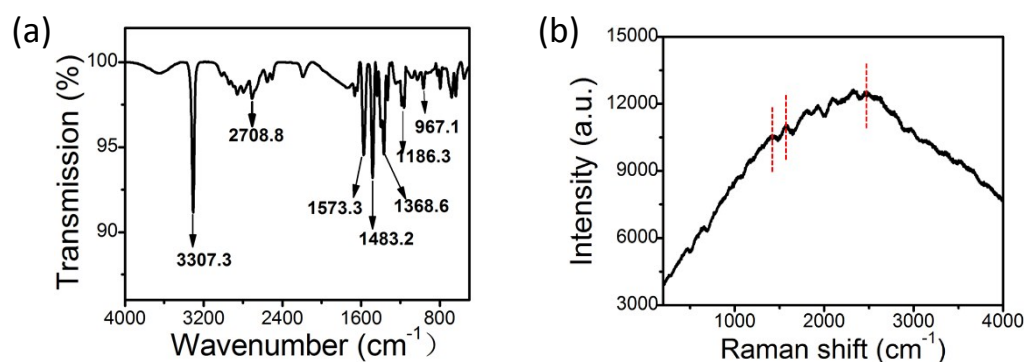

**Fig. S1** FTIR spectrum (a) and Raman spectrum(b) of the as-prepared N-CNDs.

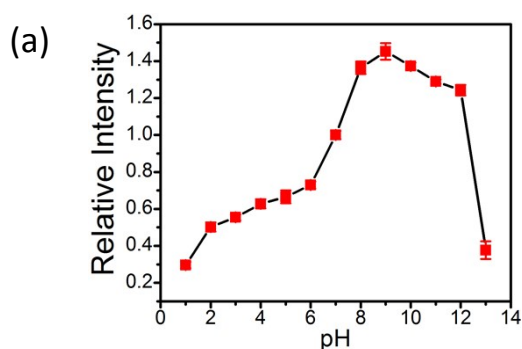

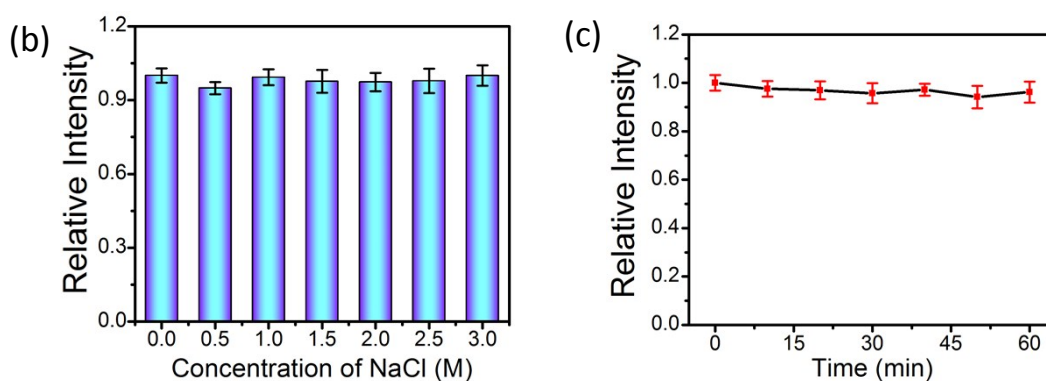

**Fig. S2** Stability of N-CNDs: (a) Effect of pH on fluorescence intensity of N-CNDs. The pH is adjusted by the PBS buffers. (b) Effect of ionic strengths on the fluorescence intensity of N-CNDs ( $0.8 \text{ mg mL}^{-1}$ ). The ionic strength was controlled by various concentrations of NaCl. (c) Effect of time intervals with UV irradiation on FL intensity of N-CNDs.

**Table S2** Comparison of the photostability of N-CNDs with the commercially available organic dyes and semiconductor quantum dots.

| Types of probe     | Light source                                                                      | Radiation time | Changes in FL intensity                        | Ref          |
|--------------------|-----------------------------------------------------------------------------------|----------------|------------------------------------------------|--------------|
| Alexa Fluor 555    | 100-W mercury arc lamp                                                            | 95 s           | retained almost 90% of fluorescence            | <sup>1</sup> |
| Cy3 dyes           | 100-W mercury arc lamp                                                            | 95 s           | retained about 75% fluorescence                | <sup>1</sup> |
| Alexa Fluor 647    | 100-W mercury arc lamp                                                            | 95 s           | retained about 80% of the initial fluorescence | <sup>1</sup> |
| Cy5 dyes           | 100-W mercury arc lamp                                                            | 95 s           | retained only 55%                              | <sup>1</sup> |
| FITC               | 450 W xenon lamp                                                                  | 15 min         | Severe photobleaching                          | <sup>2</sup> |
| CdTe QDs           | 450 W xenon lamp                                                                  | 45 min         | fluorescence is severely quenched              | <sup>2</sup> |
| CdSe/ZnS QDs       | 450 W xenon lamp                                                                  | 160 min        | fluorescence is severely quenched              | <sup>2</sup> |
| <i>CdTe QD SPE</i> | two-photon excitation (1.6 mW at 405 nm laser and 6 mW at 800 nm from a fs laser) | 10 s           | 70% reduction                                  | <sup>3</sup> |
| <i>CdTe QD TPE</i> | single photon excitation (1.6 mW at 405 nm laser)                                 | 10 s           | 90% reduction                                  | <sup>3</sup> |
| N-CNDs             | UV radiation of 365 nm (10 W)                                                     | 60 min         | No change                                      | In this work |

**Table S3** Comparison of proposed method with the other analytical methods for VB<sub>12</sub> detection.

| Method                                           | Detection limit (nM) | Detection range (μM) | Pretreatment | Ref       |
|--------------------------------------------------|----------------------|----------------------|--------------|-----------|
| Raman spectroscopy                               | 70                   | 10 nM to 10 μM       | yes          | 4         |
| Chemiluminescence                                | 0.016                | 0.07378 nM-7.378 μM  | yes          | 5         |
| Immunoassay with electrochemical magneto sensors | 13.1                 | 21.1–129.3 nM        | yes          | 6         |
| HPLC                                             | 51                   | 7.378 nM–7.378 μM    | yes          | 7         |
| Silicon quantum dots                             | 158                  | 0.5 μM –16.0 μM      | yes          | 8         |
| N-CNDs                                           | 47.4                 | 0.5 – 34.3 μM        | No           | This work |

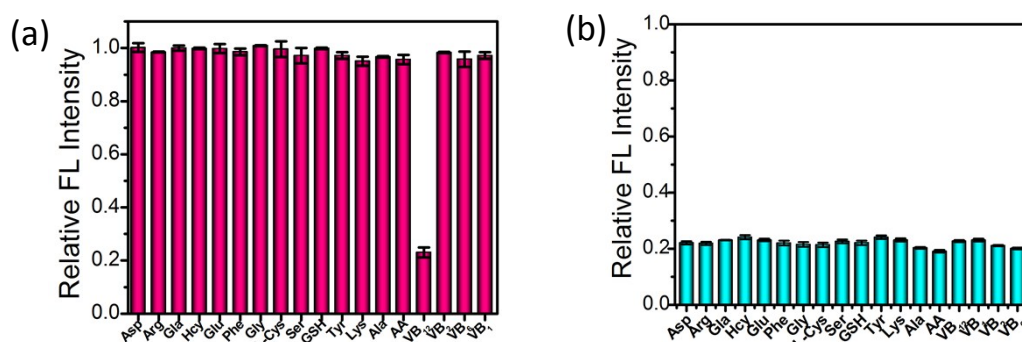

**Fig. S3** (a) Response of fluorescence intensity of N-CNDs ( $0.8 \text{ mg mL}^{-1}$ ) after the addition of VB<sub>12</sub> ( $0.05 \text{ mM}$ ) or other analytes ( $0.05 \text{ mM}$ ). (b) Response of fluorescence intensity of N-CNDs ( $0.8 \text{ mg mL}^{-1}$ ) in the presence of VB<sub>12</sub> ( $0.05 \text{ mM}$ , blank) with different coexistent materials (their concentrations are kept at  $0.25 \text{ mM}$ ).

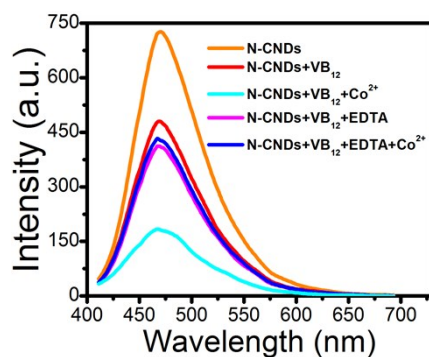

**Fig. S4** FL emission spectra of N-CNDs under different conditions (Concentration of CDs was  $0.8 \text{ mg mL}^{-1}$ , VB<sub>12</sub> concentration was  $10 \text{ μM}$ , Co<sup>2+</sup> and EDTA concentration were  $20 \text{ μM}$  and  $100 \text{ μM}$ , respectively).

**Table S4** Double-exponential fitting of N-CNDs and N-CNDs/VB<sub>12</sub> decay curves.

| Sample name                 | N-CNDs      | N-CNDs+5 $\mu\text{M}$ VB <sub>12</sub> | N-CNDs+10 $\mu\text{M}$ VB <sub>12</sub> | N-CNDs+20 $\mu\text{M}$ VB <sub>12</sub> | N-CNDs+30 $\mu\text{M}$ VB <sub>12</sub> |
|-----------------------------|-------------|-----------------------------------------|------------------------------------------|------------------------------------------|------------------------------------------|
| $\tau_1(\text{ns})/A_1(\%)$ | 4.47/84.69  | 4.50/86.03                              | 4.45/84.57                               | 4.45/84.05                               | 4.51/86.02                               |
| $\tau_2(\text{ns})/A_2(\%)$ | 13.49/15.31 | 15.82/13.97                             | 13.90/15.43                              | 14.62/15.95                              | 15.60/13.98                              |
| Average $\tau$ (ns)         | 5.85        | 6.09                                    | 5.91                                     | 6.07                                     | 6.06                                     |
| $\chi^2$                    | 0.989       | 0.968                                   | 1.207                                    | 1.002                                    | 1.061                                    |

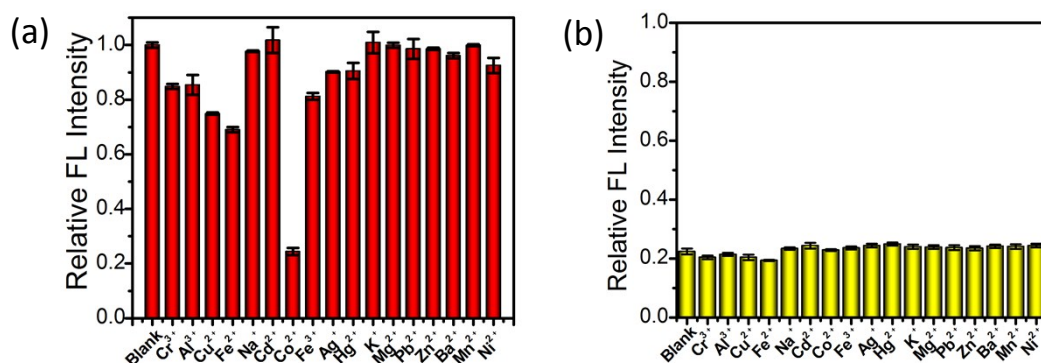

**Fig. S5** (a) Response of fluorescence intensity of N-CNDs (0.8 mg mL<sup>-1</sup>) after the addition of Co<sup>2+</sup> (0.1 mM) or other metal ions (0.1 mM). (b) Response of fluorescence intensity of N-CNDs (0.8 mg mL<sup>-1</sup>) in the presence of Co<sup>2+</sup> (0.1 mM, blank) with different coexistent materials (their concentrations are kept at 0.5 mM). (c) Fluorescence titration spectra of N-CNDs in the presence of Co<sup>2+</sup> (2.5–25  $\mu\text{M}$ ). Inset: The fluorescence intensities of N-CNDs (0.8 mg mL<sup>-1</sup>) as a function of Co<sup>2+</sup> concentration.

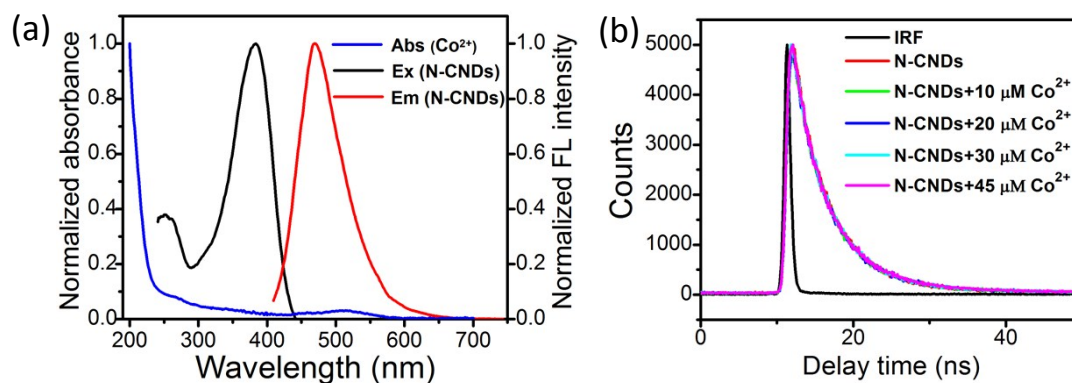

**Fig. S6** (a) The absorption spectrum of Co<sup>2+</sup> (500  $\mu\text{M}$ ) and excitation and emission spectra of N-CNDs. (b) Fluorescence decay of N-CNDs (0.8 mg mL<sup>-1</sup>) in the absence and presence of Co<sup>2+</sup> with different concentration (10, 20, 30 and 45  $\mu\text{M}$ ) as a function of time at  $\lambda_{\text{ex}}/\lambda_{\text{em}}$  of 384/ 470 nm.

**Table S5** Double-exponential fitting of N-CNDs and N-CNDs/Co<sup>2+</sup> decay curves.

| Sample name                 | N-CNDs      | N-CNDs+10 $\mu\text{M}$ Co <sup>2+</sup> | N-CNDs+20 $\mu\text{M}$ Co <sup>2+</sup> | N-CNDs+30 $\mu\text{M}$ Co <sup>2+</sup> | N-CNDs+45 $\mu\text{M}$ Co <sup>2+</sup> |
|-----------------------------|-------------|------------------------------------------|------------------------------------------|------------------------------------------|------------------------------------------|
| $\tau_1(\text{ns})/A_1(\%)$ | 4.49/85.80  | 4.43/82.95                               | 4.31/78.23                               | 4.36/79.76                               | 4.25/76.23                               |
| $\tau_2(\text{ns})/A_2(\%)$ | 15.13/14.20 | 14.44/17.05                              | 12.45/21.77                              | 13.79/20.24                              | 12.64/12.64                              |
| Average $\tau$ (ns)         | 5.99        | 6.14                                     | 6.08                                     | 6.27                                     | 6.24                                     |
| $\chi^2$                    | 1.116       | 0.949                                    | 1.001                                    | 0.993                                    | 1.030                                    |

**Table S6** Analytical results for the detection of Co<sup>2+</sup> in real samples. (n = 6).

| Tea samples        | Content ( $\mu\text{M}$ ) | Added ( $\mu\text{M}$ ) | Detected ( $\mu\text{M}$ ) | RSD      | Recovery |
|--------------------|---------------------------|-------------------------|----------------------------|----------|----------|
|                    |                           |                         |                            | (%, n=6) | (%)      |
| <i>Tap water</i>   | Not detected              | 5                       | 5.70                       | 1.87     | 114.1    |
|                    |                           | 10                      | 9.93                       | 2.09     | 99.3     |
|                    |                           | 15                      | 13.6                       | 1.07     | 90.4     |
| <i>Lingde Lake</i> | Not detected              | 5                       | 5.41                       | 0.22     | 108.1    |
|                    |                           | 10                      | 8.96                       | 0.60     | 89.6     |
|                    |                           | 15                      | 13.0                       | 1.40     | 86.7     |

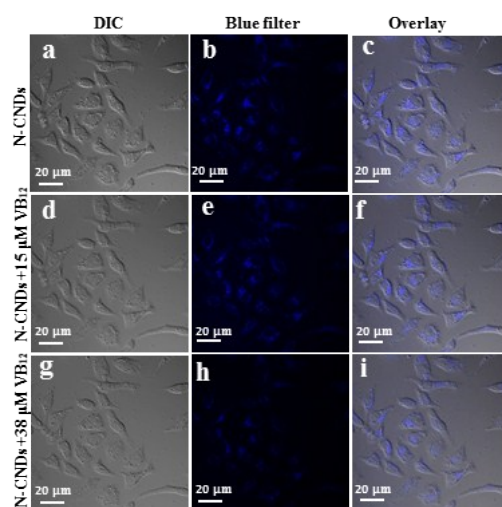**Fig. S7** Confocal fluorescence images of A549 cells incubated with 0.8 mg mL<sup>-1</sup> N-CNDs and VB<sub>12</sub> at different concentration (0, 15 and 38  $\mu\text{M}$ ). The images lie in a separate column goes to a particular filter written on the top of the column. The images were taken at  $\lambda_{\text{ex}} = 405$  nm and in the  $\lambda_{\text{em}}$  range 410–470 nm. Scale bar, 20  $\mu\text{m}$ .

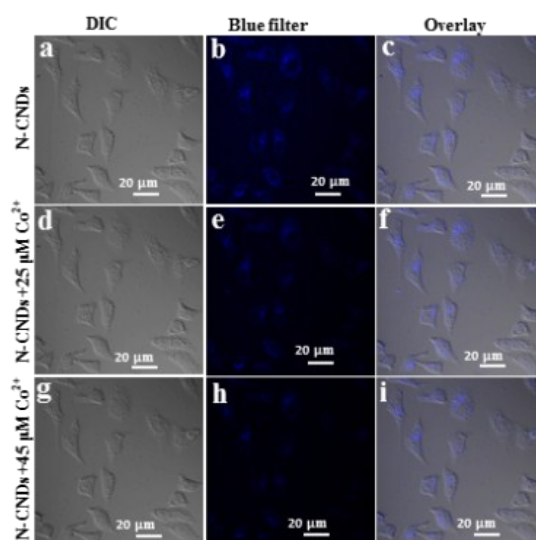

**Fig. S8** Confocal fluorescence images of A549 cells incubated with  $0.8 \text{ mg mL}^{-1}$  N-CNDs and  $\text{Co}^{2+}$  at different concentration (0, 25 and  $45 \text{ }\mu\text{M}$ ). The images lie in a separate column goes to a particular filter written on the top of the column. The images were taken at  $\lambda_{\text{ex}} = 405 \text{ nm}$  and in the  $\lambda_{\text{em}}$  range 410–470 nm. Scale bar,  $20 \text{ }\mu\text{m}$ .

1. J. E. Berlier, A. Rothe, G. Buller, J. Bradford, D. R. Gray, B. J. Filanoski, W. G. Telford, S. Yue, J. Liu and C.-Y. Cheung, *Journal of Histochemistry & Cytochemistry*, **51**, 1699-1712.
2. B. Song, Y. Zhong, S. Wu, B. Chu, Y. Su and Y. He, *Journal of the American Chemical Society*, **138**, 4824-4831.
3. Q. F. Ma, J. Y. Chen, X. Wu, P. N. Wang, Y. Yue and N. Dai, *Journal of Luminescence*, **131**, 2267-2272.
4. A. I. Radu, M. Kuellmer, B. Giese, U. Huebner, K. Weber, D. Cialla-May and J. Popp, *Talanta*, S0039914016305173.
5. K. S. Lok, S. Z. b. A. Muttalib, P. P. F. Lee, Y. C. Kwok and N.-T. Nguyen, *Lab on A Chip*, **12**, 2353.
6. A. Lermo, S. Fabiano, S. Hernández, R. Galve, M.-P. Marco, S. Alegret and M. I. Pividori, **24**, 2057-2063.
7. O. Heudi, T. Kilin?, P. Fontannaz and E. Marley, **1101**, 63-68.
8. *Luminescence*, 2019.
